# Supplementary material for: Effect of HEPA Filtration Air Purifiers on Cognitive Function: Secondary Outcome of a Pragmatic Randomized Crossover Trial
Source: Research Square preprint supplement (doi:10.21203/rs.3.rs-8108219/v1), 2025-12-08
Supplement: Supplementary file 1 [file e6c57e583b4cf4bd073daae0.docx]

**Table 1.** Characteristics of participants at trial entry.

|  | **Administrative (N = 26)** | **Incomplete (N = 11)** | **Analyzed (N = 119)** |
| --- | --- | --- | --- |
| Age in years, mean (sd) | 41.5 (10.9) | 48.0 (15.0) | 40.8 (9.4) |
| Age category, n (%)  < 40 years  40 years or older | 14 (53.8) 12 (46.2) | 2 (18.2) 9 (81.8) | 69 (58.0) 50 (42.0) |
| Sex, n (%)  Male  Female | 10 (38.5) 16 (61.5) | 3 (27.3) 8 (72.7) | 50 (42.0) 69 (58.0) |
| Ethnicity and race, n (%)  Hispanic  White, non-Hispanic  Black, non-Hispanic  Asian, non-Hispanic | 5 (19.2) 18 (69.2) 1 (3.9) 2 (7.7) | 3 (27.3)  8 (72.7) 0 (5.0) 0 (5.0) | 21 (17.6)  81 (68.1)  7 (5.9) 10 (8.4) |
| Highest level of education, n (%)  Grade or high school  Some college  College or university degree  Graduate degree | 5 (19.2) 1 (3.9)  7 (26.9) 13 (50.0) | 2 (18.2) 2 (18.2) 5 (45.4) 2 (18.2) | 11 (9.2)  15 (12.6)  31 (26.1)  62 (52.1) |
| Work status, n (%)  Unemployed  Part-time working  Full-time working | 2 (7.7)  6 (23.1) 18 (69.2) | 6 (54.5) 1 (9.1)  4 (36.4) | 19 (16.0) 12 (10.1) 88 (73.9) |
| Total annual household income, n (%)  < $48,000  $48,000 to $84,999  $85,000 or greater  Declined to answer | 0 (0.0) 1 (3.8) 19 (73.1)  6 (23.1 | 1 (9.1) 1 (9.1)  5 (45.4)  4 (36.4) | 10 (8.4)  17 (14.3)  74 (62.2)  18 (15.1) |
| Weight status, n (%)  Healthy  Overweight  Obesity | 9 (34.6) 8 (30.8) 9 (34.6) | 5 (45.4) 4 (36.4) 2 (18.2) | 52 (43.7) 36 (30.2) 31 (26.1) |
| Time spent inside home (hours per day), mean (sd) | 18.0 (3.3) | 17.3 (3.5) | 19.1 (3.6) |
| Perceived Stress Scale (PSS-4), mean (sd) | 4.6 (3.6) | 4.1 (2.9) | 3.2 (2.6) |
| Outdoor temperature in Fahrenheit, mean (sd) | 45.1 (8.3) | 47.4 (12.8) | 39.8 (12.8) |
| Trail Making Test – Part A (seconds), mean (sd) | ----- | 49.3 (49.8) | 24.3 (12.6) |
| Trail Making Test – Part B (seconds), mean (sd) | ----- | 118.6 (94.8) | 70.7 (42.9) |

**Table 2.** Characteristics of analyzed participants at the start of the intervention period by age category.

|  | **< 40 years (N = 138)** | **40 years or older (N = 100)** |
| --- | --- | --- |
| Randomized to sequence, n (%)  HEPA then sham filtration  Sham then HEPA filtration | 62 (44.9) 76 (55.1) | 42 (42.0) 58 (58.0) |
| Age in years, mean (sd) | 34.5 (2.8) | 49.4 (8.4) |
| Sex, n (%)  Male  Female | 66 (47.8) 72 (52.2) | 34 (34.0) 66 (66.0) |
| Ethnicity and race, n (%)  Hispanic  White, non-Hispanic  Black, non-Hispanic  Asian, non-Hispanic | 28 (20.3)  84 (60.9) 10 (7.2)  16 (11.6) | 14 (14.0) 78 (78.0) 4 (4.0) 4 (4.0) |
| Highest level of education, n (%)  Grade or high school  Some college  College or university degree  Graduate degree | 10 (7.2)  6 (4.4)  46 (33.3)  76 (55.1) | 12 (12.0) 24 (25.0) 16 (16.0) 48 (48.0) |
| Work status, n (%)  Unemployed  Part-time working  Full-time working | 14 (10.1)  8 (5.8) 116 (84.1) | 24 (24.0) 16 (15.0) 60 (60.0) |
| Total annual household income, n (%)  < $48,000  $48,000 to $84,999  $85,000 or greater  Declined to answer | 8 (5.8) 12 (8.7)  98 (71.0)  20 (14.5) | 12 (12.0) 22 (22.0) 50 (50.0) 16 (16.0) |
| Weight status, n (%)  Healthy  Overweight  Obesity | 74 (53.6) 38 (27.6) 26 (18.8) | 30 (30.0) 34 (34.0) 36 (36.0) |
| Time spent inside home (hours per day), mean (sd) | 18.9 (3.8) | 18.7 (3.5) |
| Perceived Stress Scale (PSS-4), mean (sd) | 3.2 (2.9) | 2.9 (2.7) |
| Outdoor temperature in Fahrenheit, mean (sd) | 43.6 (13.2) | 44.3 (13.9) |
| Trail Making Test – Part A (seconds), mean (sd) | 21.2 (9.1) | 25.2 (16.2) |
| Trail Making Test – Part B (seconds), mean (sd) | 58.3 (28.9) | 72.7 (50.0) |

**Table 3.** Trail Making Test – Part A and Part B completion times at the end of the intervention period

| **Part A (seconds)** |  | **HEPA** | **Sham** | **Ratio of Means** | **P-value** |
| --- | --- | --- | --- | --- | --- |
|  | **NHEPA , NSham** | **mean (se)** | **mean (se)** | **(95% CI)** |  |
| Overall | 119 , 119 | 20.3 (0.5) | 19.7 (0.5) | 1.03 (0.96 , 1.10) | 0.38 |
| < 40 years of age | 69 , 69 | 19.5 (0.6) | 18.7 (0.6) | 1.04 (0.95 , 1.15) | 0.34 |
| 40 years or older | 50 , 50 | 21.4 (0.8) | 21.2 (0.8) | 1.01 (0.92 , 1.11) | 0.82 |
|  |  |  |  |  |  |
| **Part B (seconds)** |  | **HEPA** | **Sham** | **Ratio of Means** | **P-value** |
|  | **NHEPA , NSham** | **mean (se)** | **mean (se)** | **(95% CI)** |  |
| Overall | 119 , 119 | 53.6 (1.6) | 55.8 (1.6) | 0.96 (0.89 , 1.04) | 0.33 |
| < 40 years of age | 69 , 69 | 53.7 (2.0) | 51.4 (2.0) | 1.04 (0.94 , 1.16) | 0.43 |
| 40 years or older | 50 , 50 | 54.0 (2.4) | 61.4 (2.4) | 0.88 (0.79 , 0.98) | 0.02 |

Results were adjusted for the corresponding Trail Making Test completion time at the start of each intervention period. Results were also adjusted for number of hours per day spent indoors at home a week prior to the Trail Making Test, and Perceived Stress Scale (PSS-4) score and outdoor temperature at the time of completing the Trail Making Test.

**Figure 1. Distribution of Trail Making Test – Part A and Part B completion times at the end of the intervention periods by age category**

| **A: Part A < 40 years** | **B: Part A > 40 years** |
| --- | --- |
| 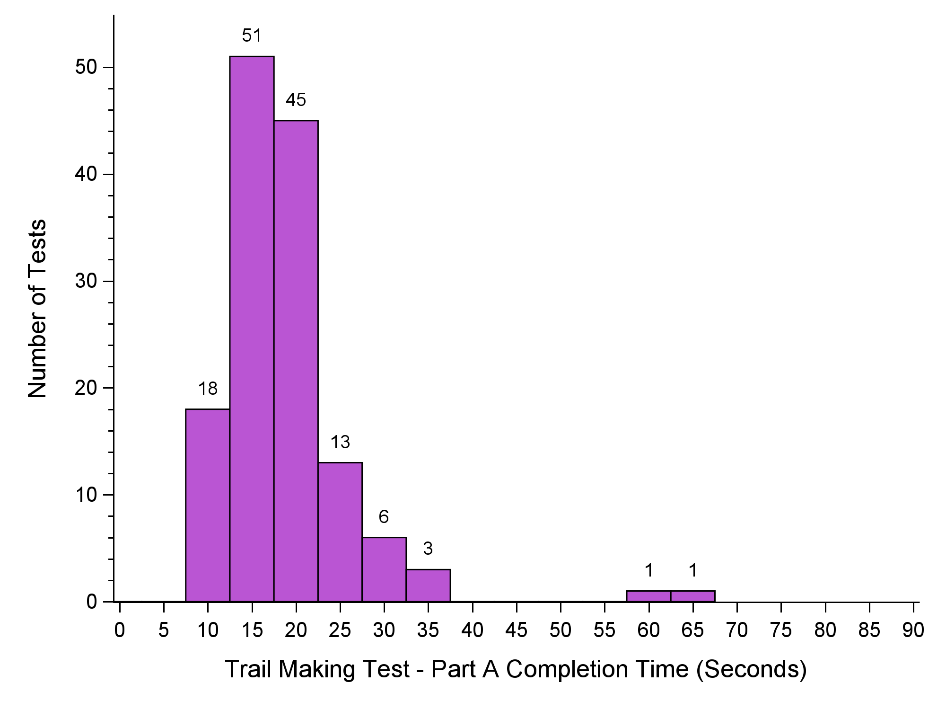 | 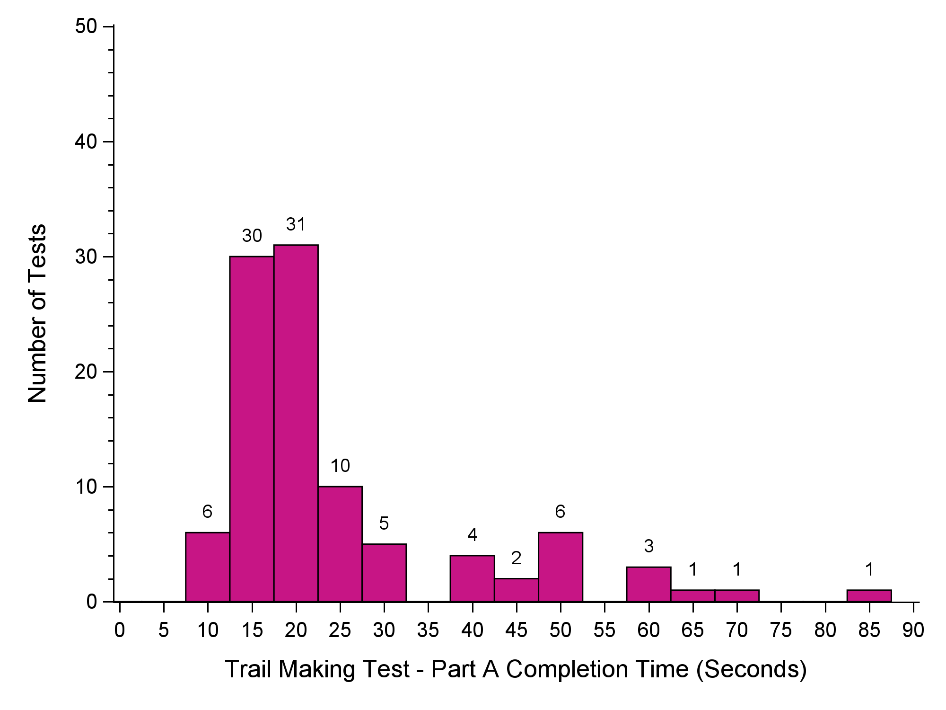 |
|  |  |
| **C: Part B < 40 years** | **D: Part B > 40 years** |
| 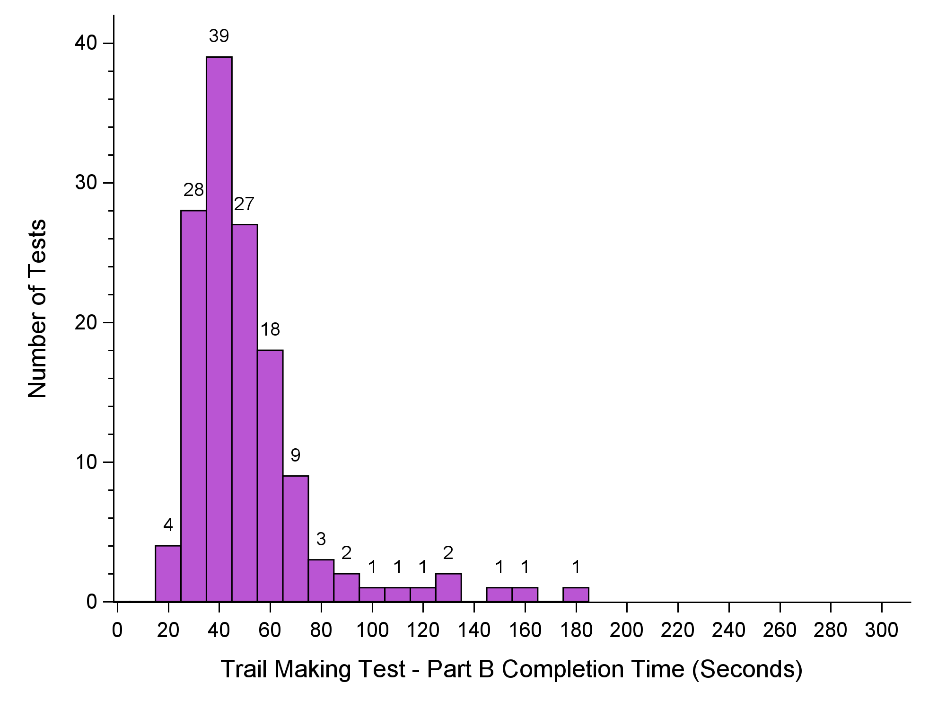 | 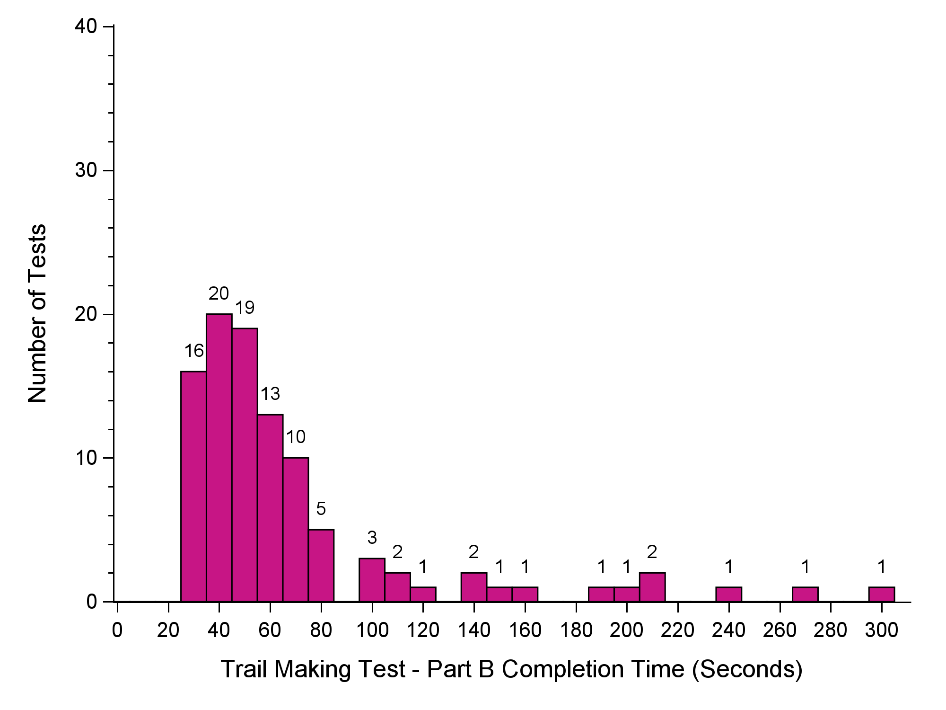 |

**Figure 2. Comparison of Trail Making Test – Part A and Part B completion times at the end of the intervention periods between HEPA and sham filtration**

**A. Trail Making Test – Part A**





**B. Trail Making Test – Part B**
